# Supplementary material
Source: PubMed Central journal article supplement (PMC9334735)
Supplement: 134_2022_6806_MOESM2_ESM.pdf [file 134_2022_6806_MOESM2_ESM.pdf]

### Figure 1 legend's references

1. Shapiro BA, Warren J, Egol AB, Greenbaum DM, Jacobi J, Nasraway SA, Schein RM, Spevetz A, Stone JR: **Practice parameters for intravenous analgesia and sedation for adult patients in the intensive care unit: an executive summary.** Society of Critical Care Medicine. *Crit Care Med* 1995, **23**(9):1596-1600.
2. Brook AD, Ahrens TS, Schaiff R, Prentice D, Sherman G, Shannon W, Kollef MH: **Effect of a nursing-implemented sedation protocol on the duration of mechanical ventilation.** *Crit Care Med* 1999, **27**(12):2609-2615.
3. Kress JP, Pohlman AS, O'Connor MF, Hall JB: **Daily interruption of sedative infusions in critically ill patients undergoing mechanical ventilation.** *N Engl J Med* 2000, **342**(20):1471-1477.
4. Jacobi J, Fraser GL, Coursin DB, Riker RR, Fontaine D, Wittbrodt ET, Chalfin DB, Masica MF, Bjerke HS, Coplin WM *et al*: **Clinical practice guidelines for the sustained use of sedatives and analgesics in the critically ill adult.** *Crit Care Med* 2002, **30**(1):119-141.
5. Muellejans B, López A, Cross MH, Bonome C, Morrison L, Kirkham AJT: **Remifentanyl versus fentanyl for analgesia based sedation to provide patient comfort in the intensive care unit: a randomized, double-blind controlled trial [ISRCTN43755713].** *Crit Care* 2004, **8**(1):R1-R11.
6. Girard TD, Kress JP, Fuchs BD, Thomason JW, Schweickert WD, Pun BT, Taichman DB, Dunn JG, Pohlman AS, Kinniry PA *et al*: **Efficacy and safety of a paired sedation and ventilator weaning protocol for mechanically ventilated patients in intensive care (Awakening and Breathing Controlled trial): a randomised controlled trial.** *Lancet* 2008, **371**(9607):126-134.
7. Treggiari MM, Romand JA, Yanez ND, Deem SA, Goldberg J, Hudson L, Heidegger CP, Weiss NS: **Randomized trial of light versus deep sedation on mental health after critical illness.** *Crit Care Med* 2009, **37**(9):2527-2534.
8. Carson SS, Kress JP, Rodgers JE, Vinayak A, Campbell-Bright S, Levitt J, Bourdet S, Ivanova A, Henderson AG, Pohlman A *et al*: **A randomized trial of intermittent lorazepam versus propofol with daily interruption in mechanically ventilated patients.** *Crit Care Med* 2006, **34**(5):1326-1332.
9. Pandharipande PP, Pun BT, Herr DL, Maze M, Girard TD, Miller RR, Shintani AK, Thompson JL, Jackson JC, Deppen SA *et al*: **Effect of sedation with dexmedetomidine vs lorazepam on acute brain dysfunction in mechanically ventilated patients: the MENDS randomized controlled trial.** *JAMA* 2007, **298**(22):2644-2653.
10. Riker RR, Shehabi Y, Bokesch PM, Ceraso D, Wisemandle W, Koura F, Whitten P, Margolis BD, Byrne DW, Ely EW *et al*: **Dexmedetomidine vs midazolam for sedation of critically ill patients: a randomized trial.** *JAMA* 2009, **301**(5):489-499.
11. Strom T, Martinussen T, Toft P: **A protocol of no sedation for critically ill patients receiving mechanical ventilation: a randomised trial.** *Lancet* 2010, **375**(9713):475-480.
12. Needham DM, Davidson J, Cohen H, Hopkins RO, Weinert C, Wunsch H, Zawistowski C, Bemis-Dougherty A, Berney SC, Bienvenu OJ *et al*: **Improving long-term outcomes after discharge from intensive care unit: report from a stakeholders' conference.** *Crit Care Med* 2012, **40**(2):502-509.
13. Shehabi Y, Bellomo R, Reade MC, Bailey M, Bass F, Howe B, McArthur C, Seppelt IM, Webb S, Weisbrodt L *et al*: **Early intensive care sedation predicts long-term mortality in ventilated critically ill patients.** *Am J Respir Crit Care Med* 2012, **186**(8):724-731.
14. Barr J, Fraser GL, Puntillo K, Ely EW, Gelinas C, Dasta JF, Davidson JE, Devlin JW, Kress JP, Joffe AM *et al*: **Clinical practice guidelines for the management of pain, agitation, and delirium in adult patients in the intensive care unit.** *Crit Care Med* 2013, **41**(1):263-306.
15. Balas MC, Rice M, Chaperon C, Smith H, Disbot M, Fuchs B: **Management of delirium in critically ill older adults.** *Crit Care Nurse* 2012, **32**(4):15-26.

16. Chanques G, Conseil M, Roger C, Constantin JM, Prades A, Carr J, Muller L, Jung B, Belafia F, Cisse M *et al*: **Immediate interruption of sedation compared with usual sedation care in critically ill postoperative patients (SOS-Ventilation): a randomised, parallel-group clinical trial**. *Lancet* 2018, **391**(10153):1253-1261.
17. Devlin JW, Skrobik Y, Gelinas C, Needham DM, Slooter AJC, Pandharipande PP, Watson PL, Weinhouse GL, Nunnally ME, Rochweg B *et al*: **Clinical Practice Guidelines for the Prevention and Management of Pain, Agitation/Sedation, Delirium, Immobility, and Sleep Disruption in Adult Patients in the ICU**. *Crit Care Med* 2018, **46**(9):e825-e873.
18. Shehabi Y, Howe BD, Bellomo R, Arabi YM, Bailey M, Bass FE, Bin Kadiman S, McArthur CJ, Murray L, Reade MC *et al*: **Early Sedation with Dexmedetomidine in Critically Ill Patients**. *N Engl J Med* 2019, **380**(26):2506-2517.
19. Pun BT, Balas MC, Barnes-Daly MA, Thompson JL, Aldrich JM, Barr J, Byrum D, Carson SS, Devlin JW, Engel HJ *et al*: **Caring for Critically Ill Patients with the ABCDEF Bundle: Results of the ICU Liberation Collaborative in Over 15,000 Adults**. *Crit Care Med* 2019, **47**(1):3-14.
20. Olsen HT, Nedergaard HK, Strom T, Oxlund J, Wian KA, Ytrebo LM, Kroken BA, Chew M, Korkmaz S, Lauridsen JT *et al*: **Nonsedation or Light Sedation in Critically Ill, Mechanically Ventilated Patients**. *N Engl J Med* 2020, **382**(12):1103-1111.
21. Chanques G, Constantin JM, Devlin JW, Ely EW, Fraser GL, Gelinas C, Girard TD, Guerin C, Jabaudon M, Jaber S *et al*: **Analgesia and sedation in patients with ARDS**. *Intensive Care Med* 2020, **46**(12):2342-2356.
22. Hughes CG, Mailloux PT, Devlin JW, Swan JT, Sanders RD, Anzueto A, Jackson JC, Hoskins AS, Pun BT, Orun OM *et al*: **Dexmedetomidine or Propofol for Sedation in Mechanically Ventilated Adults with Sepsis**. *N Engl J Med* 2021, **384**(15):1424-1436.
23. Pun BT, Badenes R, Heras La Calle G, Orun OM, Chen W, Raman R, Simpson BK, Wilson-Linville S, Hinojal Olmedillo B, Vallejo de la Cueva A *et al*: **Prevalence and risk factors for delirium in critically ill patients with COVID-19 (COVID-D): a multicentre cohort study**. *Lancet Respir Med* 2021, **9**(3):239-250.
