# Supplementary material
Source: PubMed Central journal article supplement (PMC9334735)

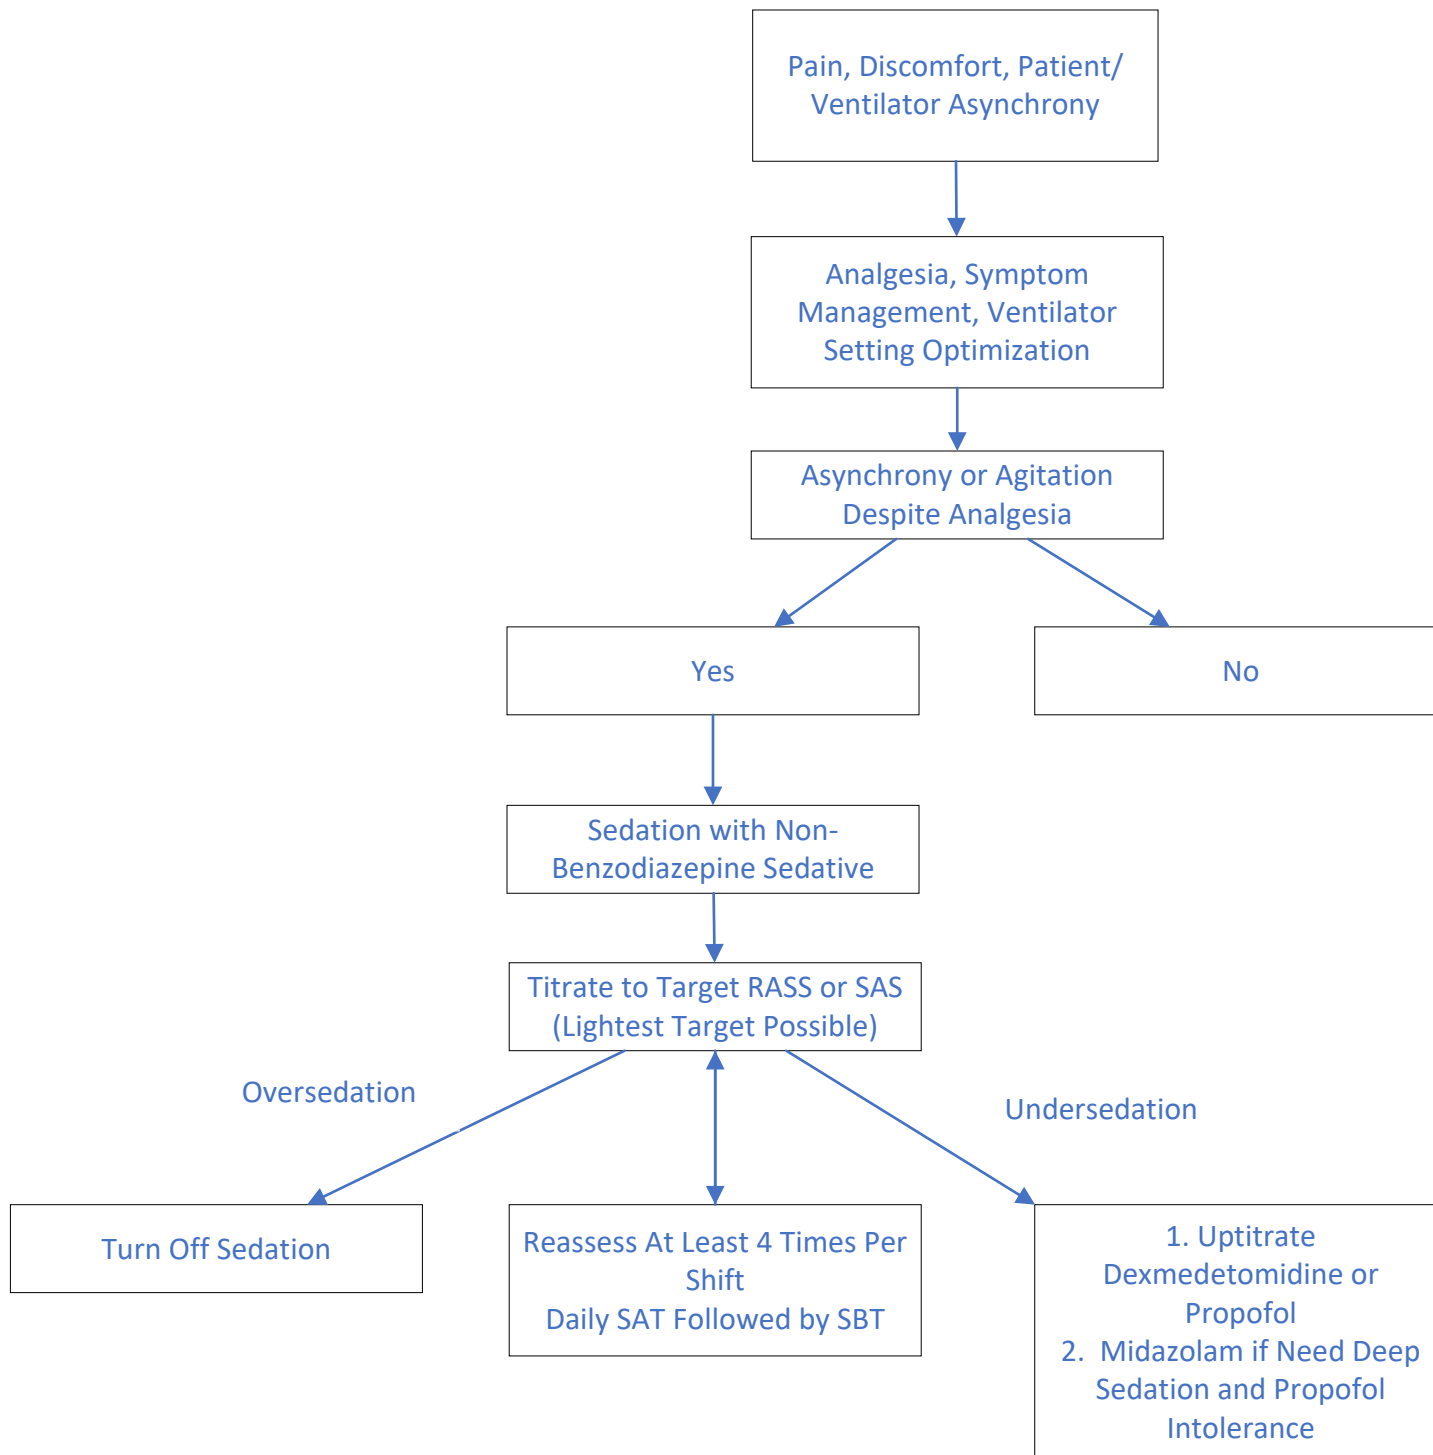

Supplement: 134_2022_6806_MOESM1_ESM.pdf [file 134_2022_6806_MOESM1_ESM.pdf]
